# Supplementary material
Source: PubMed Central journal article supplement (PMC6750210)

# Supporting Information

## Enhanced Sample Handling for Analytical Ultracentrifugation With 3D-Printed Centerpieces

Samuel C. To<sup>†</sup>, Chad A. Brautigam<sup>‡</sup>, Sumit K. Chaturvedi<sup>†</sup>, Mary T. Bollard<sup>†</sup>, Jonathan Krynitsky<sup>#</sup>, John W. Kakareka<sup>#</sup>, Thomas J. Pohida<sup>#</sup>, Huaying Zhao<sup>†</sup>, Peter Schuck<sup>†,\*</sup>

<sup>†</sup>Dynamics of Macromolecular Assembly Section, Laboratory of Cellular Imaging and Macromolecular Biophysics, National Institute of Biomedical Imaging and Bioengineering, National Institutes of Health, Bethesda, MD 20892

<sup>‡</sup>Departments of Biophysics and Microbiology, UT Southwestern Medical Center, Dallas, Texas, United States

<sup>#</sup>Division of Computational Bioscience, Center for Information Technology, National Institutes of Health, Bethesda, MD 20892

Corresponding author: [Peter.Schuck@nih.gov](mailto:Peter.Schuck@nih.gov)

### **Contents**

|                                                                                                                                          |          |
|------------------------------------------------------------------------------------------------------------------------------------------|----------|
| <b><u>Supporting Materials and Methods</u></b> .....                                                                                     | <b>3</b> |
| <u>Analytical Ultracentrifugation</u> .....                                                                                              | 3        |
| <u>Materials</u> .....                                                                                                                   | 3        |
| <b><u>Supporting Table 1</u></b> .....                                                                                                   | <b>4</b> |
| <u>Summary of sedimentation coefficients and signal amplitudes of BSA monomer peak in replicate series</u><br>.....                      | 4        |
| <b><u>Supporting Figures</u></b> .....                                                                                                   | <b>5</b> |
| <u>Supporting Figure S1: Pictures of 3D Printed Centerpiece by Stereolithography in Epoxy-Based Photopolymer (Microfine Green)</u> ..... | 5        |
| <u>Supporting Figure S2: Sedimentation velocity data of 3D printed centerpieces in different materials</u> ....                          | 6        |
| <u>Supporting Figure S3: Sedimentation velocity data of 3D printed centerpiece in run #11 of replicate series</u> .....                  | 7        |
| <u>Supporting Figure S4: Mechanical stability of the long-column 3D printed centerpiece at 60,000 rpm</u> ..                             | 8        |
| <u>Supporting Figure S5: Residuals histograms of long-column 3D printed vs conventional centerpiece</u> ..                               | 9        |
| <u>Supporting Figure S6: Comparison of BSA monomer SV data from narrow-sector and conventional centerpieces</u> .....                    | 10       |

## **Supporting Materials and Methods**

### **Analytical Ultracentrifugation**

SV experiments were carried out in a ProteomeLab XL-A/I (Beckman Coulter, Indianapolis IN) following standard techniques<sup>15</sup> unless mentioned otherwise. Samples were filled using a pipettor with long gel loading tips, to achieve  $\approx 12$  mm solution column height. For example, 400  $\mu$ L samples were loaded into standard 12 mm pathlength double-sector centerpieces. The rotor was temperature equilibrated at a nominal 20 °C while resting in the rotor chamber prior to start of centrifugation. After acceleration to 50,000 rpm, data acquisition was commenced using the Rayleigh interference optical system and/or the absorbance optical system.

### **Materials**

Bovine serum albumin (BSA) (catalog # A7030; Sigma Aldrich, St. Louis, MO) samples were dissolved in 10 mM sodium phosphate, pH 7.4, 150 mM NaCl; hen egg lysozyme (catalog # L6876; Sigma Aldrich, St. Louis, MO) was dialyzed against 10 mM sodium acetate pH 4.6, 100 mM NaCl. BSA monomer was prepared by gel filtration (Superdex 200 16/60; GE Healthcare Bio-Sciences, Uppsala, Sweden) followed by concentration in an Amicon Ultra-4 Centrifugal Filter Unit with 10 kDa cutoff (Millipore Sigma, Burlington, MA).

## Supporting Table 1

### Summary of sedimentation coefficients and signal amplitudes of BSA monomer peak in replicate series

Values are reported as mean and standard deviation for of 3D Printed Centerpiece (3D1-3D3) and conventional Epon centerpieces (EC1 – ED3) in interference optics (top) and absorbance optics (bottom). For comparison, the data plotted in **Figure 2** are 3D2 and EC2.

|     | IF          |       |          |                            |      |          |
|-----|-------------|-------|----------|----------------------------|------|----------|
|     | s-value (S) |       |          | signal of monomer peak (%) |      |          |
|     | mean        | std   | std/mean | mean                       | std  | std/mean |
| 3D1 | 4.301       | 0.024 | 0.6%     | 69.1%                      | 0.7% | 1.0%     |
| 3D2 | 4.313       | 0.022 | 0.5%     | 70.2%                      | 1.0% | 1.4%     |
| 3D3 | 4.299       | 0.024 | 0.6%     | 68.8%                      | 1.4% | 2.1%     |
| EC1 | 4.309       | 0.019 | 0.4%     | 69.8%                      | 0.9% | 1.2%     |
| EC2 | 4.312       | 0.014 | 0.3%     | 70.5%                      | 0.9% | 1.2%     |
| EC3 | 4.310       | 0.020 | 0.5%     | 69.8%                      | 0.8% | 1.2%     |

|     | ABS         |       |          |                            |      |          |
|-----|-------------|-------|----------|----------------------------|------|----------|
|     | s-value (S) |       |          | signal of monomer peak (%) |      |          |
|     | mean        | std   | std/mean | mean                       | std  | std/mean |
| 3D1 | 4.334       | 0.019 | 0.4%     | 72.3%                      | 1.1% | 1.6%     |
| 3D2 | 4.328       | 0.016 | 0.4%     | 72.4%                      | 0.8% | 1.1%     |
| 3D3 | 4.329       | 0.016 | 0.4%     | 71.8%                      | 0.8% | 1.1%     |
| EC1 | 4.341       | 0.020 | 0.5%     | 71.8%                      | 0.7% | 1.0%     |
| EC2 | 4.345       | 0.014 | 0.3%     | 72.3%                      | 0.9% | 1.3%     |
| EC3 | 4.340       | 0.020 | 0.4%     | 72.0%                      | 0.8% | 1.1%     |

## Supporting Figures

### **Supporting Figure S1: Pictures of 3D Printed Centerpiece by Stereolithography in Epoxy-Based Photopolymer (Microfine Green)**

Photographs of 3D printed centerpiece fabricated by stereolithography in Microfine Green in the design of Figure 1. (A) Side view, with axis indicating the z-direction of printing, and the x-y plane normal to z. The red patch highlights an area that is shown in (B) after cutting the centerpiece open to observe the inner surface of the sector in a microscope. Periodic lines are visible in the z-direction corresponding to the different print layers. (C) View of the filling and venting holes. (D) View with side illumination from which the curved dome top can be discerned.

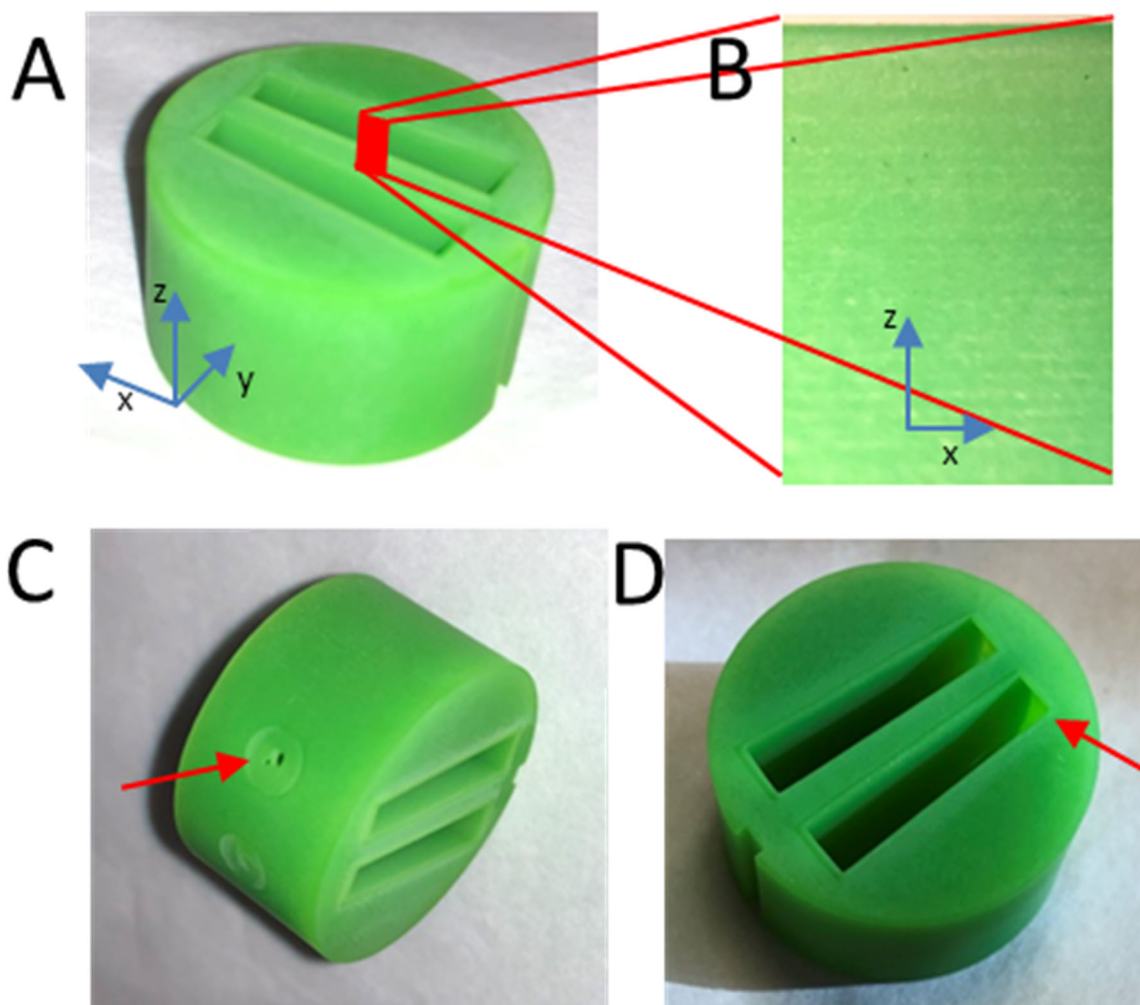

## Supporting Figure S2: Sedimentation velocity data of 3D printed centerpieces in different materials

Comparison of SV data and uncorrected  $c(s)$  distribution analysis of a BSA sample sedimenting at 50,000 rpm, recorded at 280 nm, using 3D printed long-column centerpieces in acrylic VeroClear (A), glossy VeroBlackPlus (B), polypropylene-like Rigur (C), and acrylic VeroBlack matte (D).

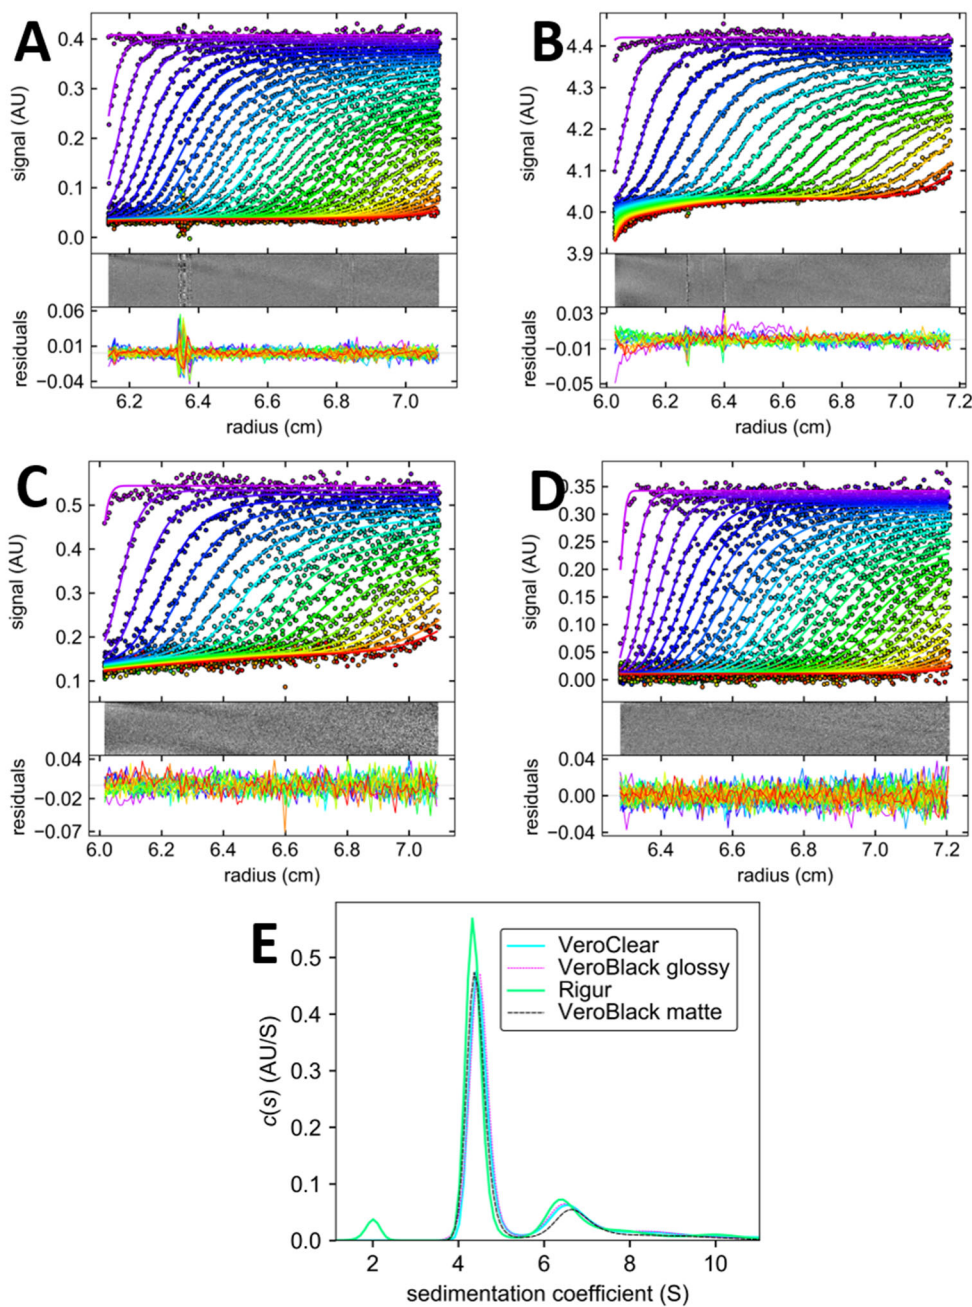

### Supporting Figure S3: Sedimentation velocity data of 3D printed centerpiece in run #11 of replicate series

Shown are data from 3D printed centerpiece #2, in round 11 of the replicate series. Data show sedimentation of 0.5 mg/ml BSA at 50,000 rpm as acquired by absorbance (top) and Rayleigh interference optical systems (data points, showing every 2<sup>nd</sup> scan with every 5<sup>th</sup> data point of absorbance and 10<sup>th</sup> data point of interference data). Solid lines are the best-fit distributions from the standard  $c(s)$  analysis.

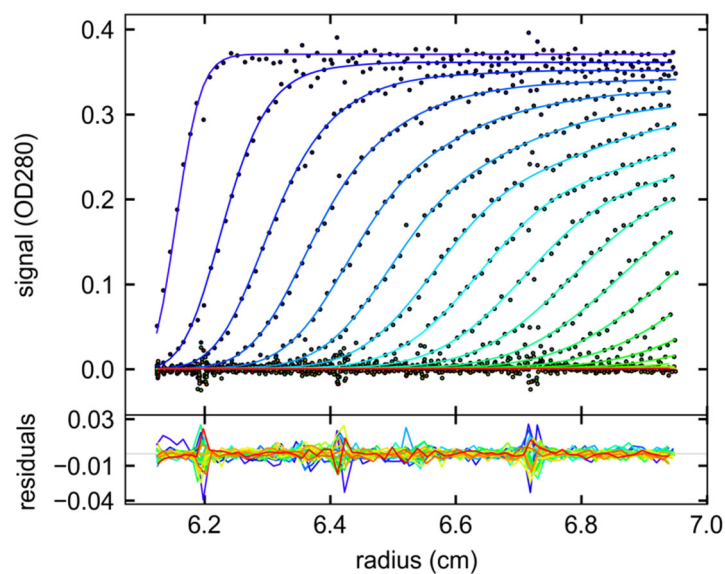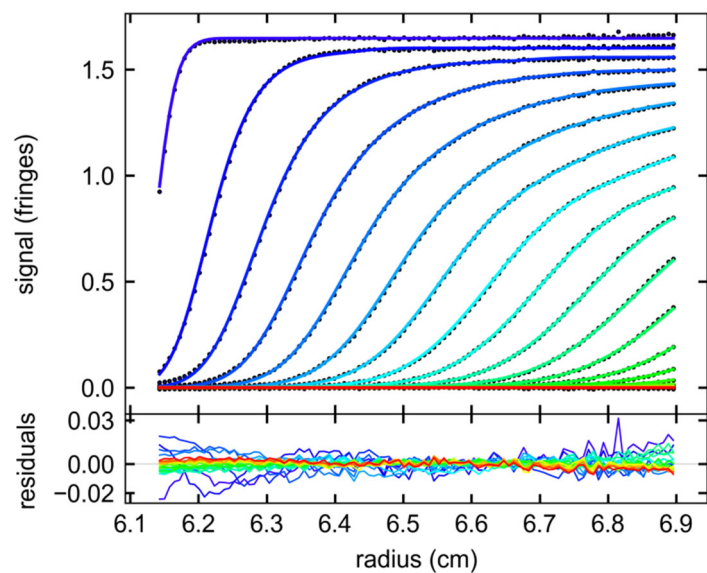



### Supporting Figure S4: Mechanical stability of the long-column 3D printed centerpiece at 60,000 rpm

A 3D printed long-column centerpiece was filled with a sample of BSA in PBS, inserted in a 4-hole rotor and sedimented at 60,000 rpm. **Top:** Absorbance optical SV data recorded at 280 nm (data points) and best-fit  $c(s)$  distribution (lines). Appended in the lower panels are the residuals bitmap and overlay. **Bottom:** Uncorrected  $c(s)$  distribution from the analysis of the absorbance data.

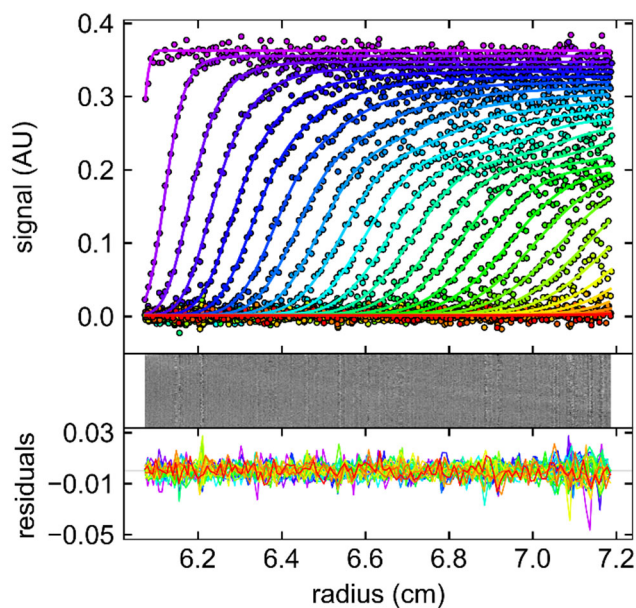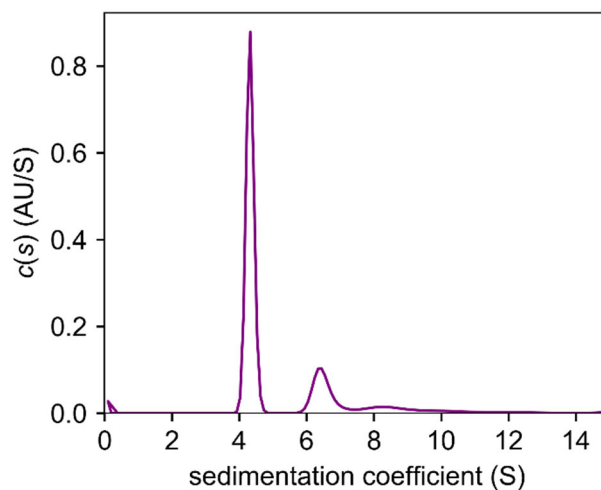

### Supporting Figure S5: Residuals histograms of long-column 3D printed vs conventional centerpiece.

Residuals are from the single-species lysozyme fit shown in **Figure 3**, binned (blue) and fitted with a Gaussian (red) in GUSI. The deviation from the bin heights and the Gaussian provides a measure for normalcy of the residuals, as quantified in the H-value introduced previously (Ma, J.; Zhao, H.; Schuck, P. A Histogram Approach to the Quality of Fit in Sedimentation Velocity Analyses. *Anal. Biochem.* **2015**, *483* (1), 1–3)

Conventional Epon centerpiece:

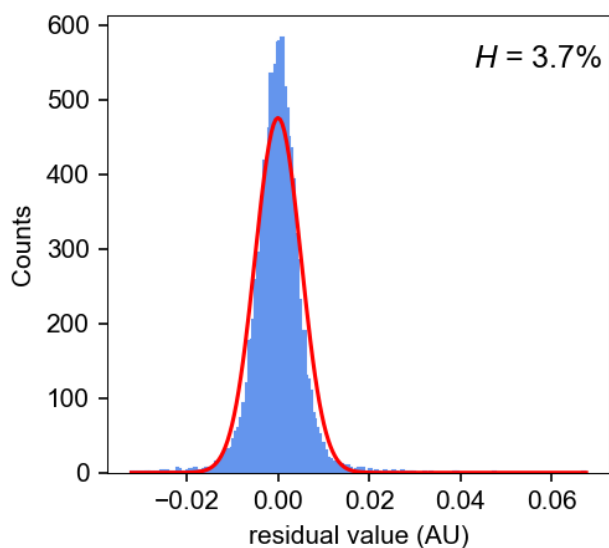

Long-column 3D printed centerpiece:

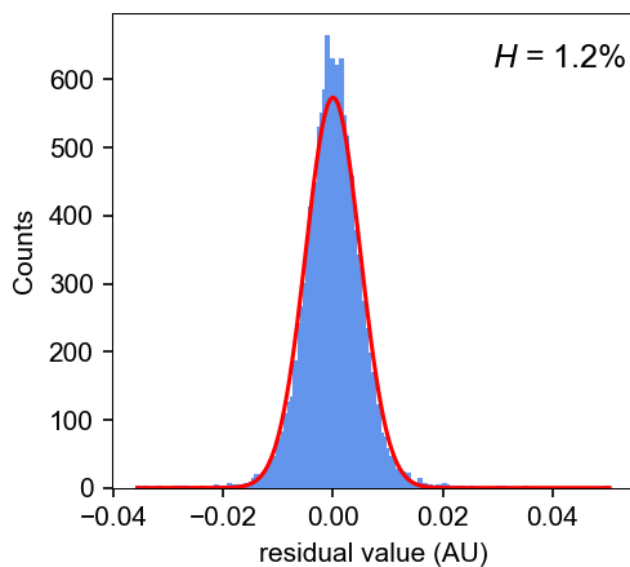



### Supporting Figure S6: Comparison of BSA monomer SV data from narrow-sector and conventional centerpieces

Fractionated BSA monomer was sedimented in conventional Epon centerpiece (A), and 3D printed narrow-sector centerpieces with  $1.5^\circ$  sector angles (B) and with  $1.0^\circ$  sector angles (C). Left panels show the SV data and fit with  $c(s)$  model, and right panels show the residuals histograms. (D)  $c(s)$  distributions of all centerpieces.

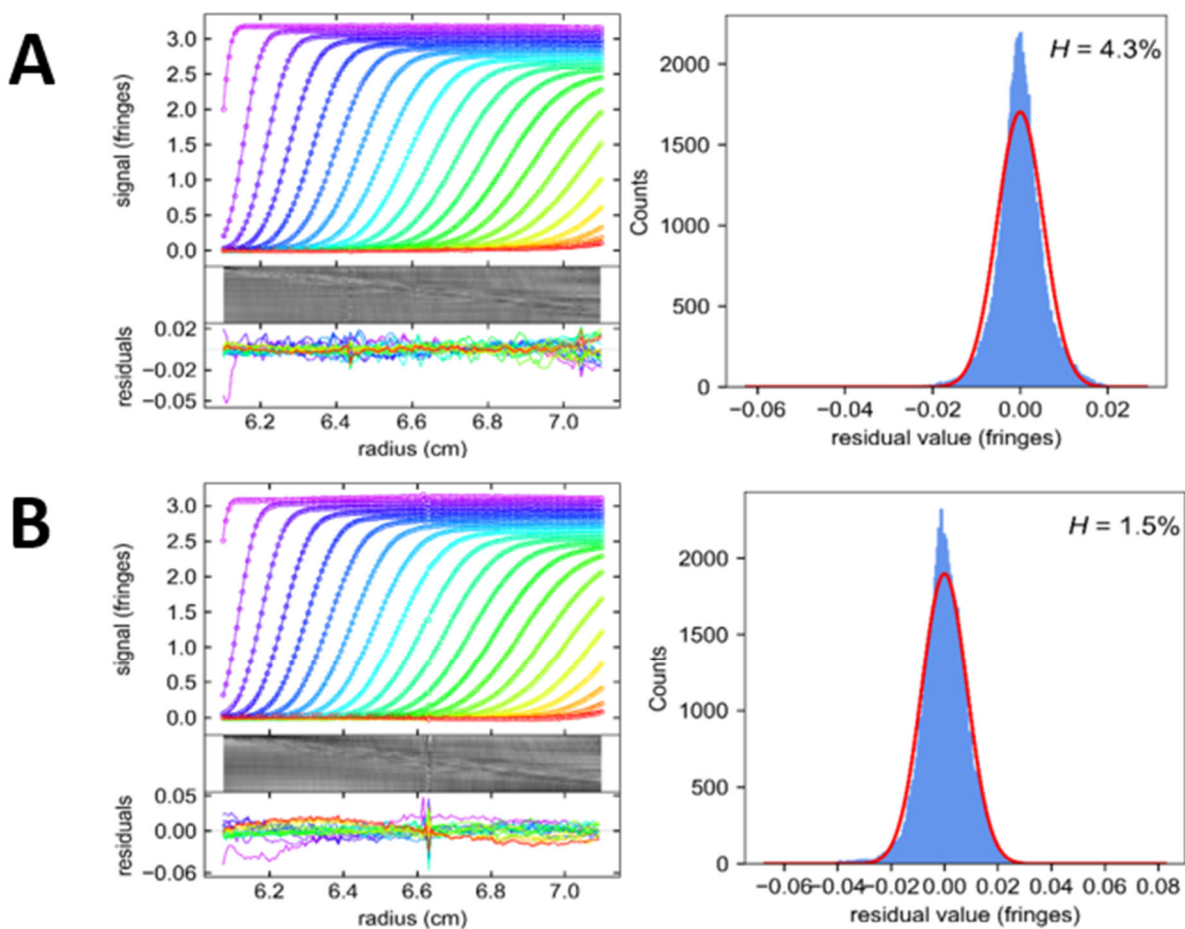

after Ma et al. *Anal. Biochem.* vol. 483 pp. 1-3

**C**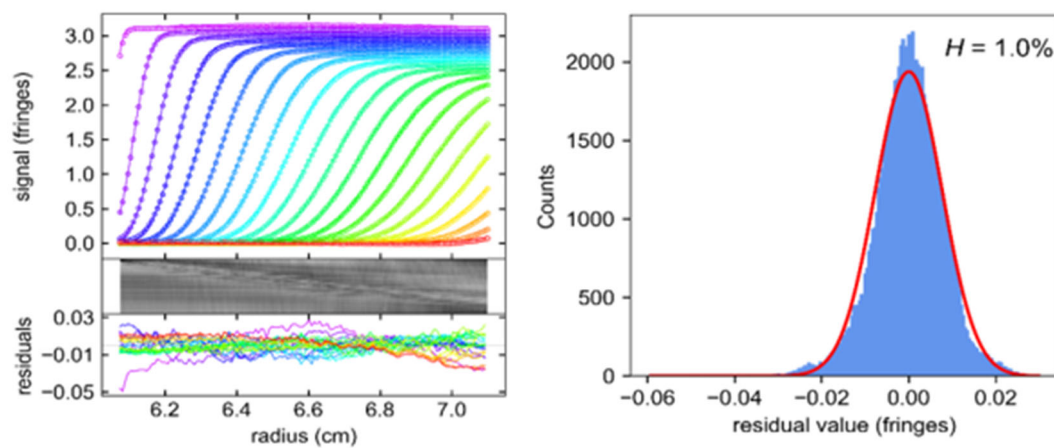**D**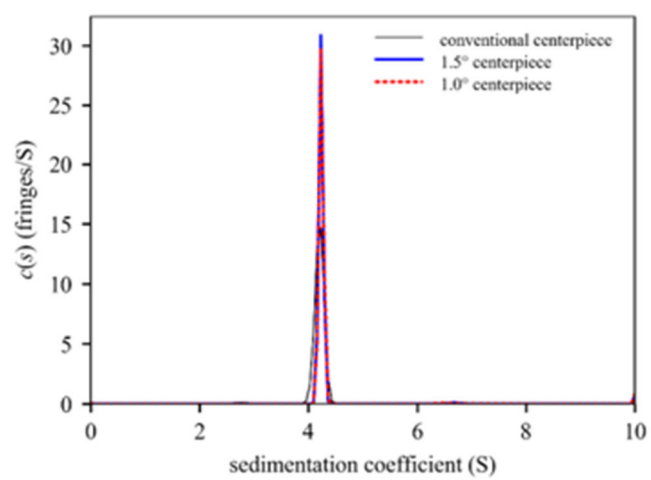

Supplement: NIHMS1050094-supplement-Supporting_Info.pdf [file NIHMS1050094-supplement-Supporting_Info.pdf]
